# Supplementary material
Source: PubMed Central journal article supplement (PMC1440292)
Supplement: NIHMS8662-supplement-suppfigs.pdf [file NIHMS8662-supplement-suppfigs.pdf]

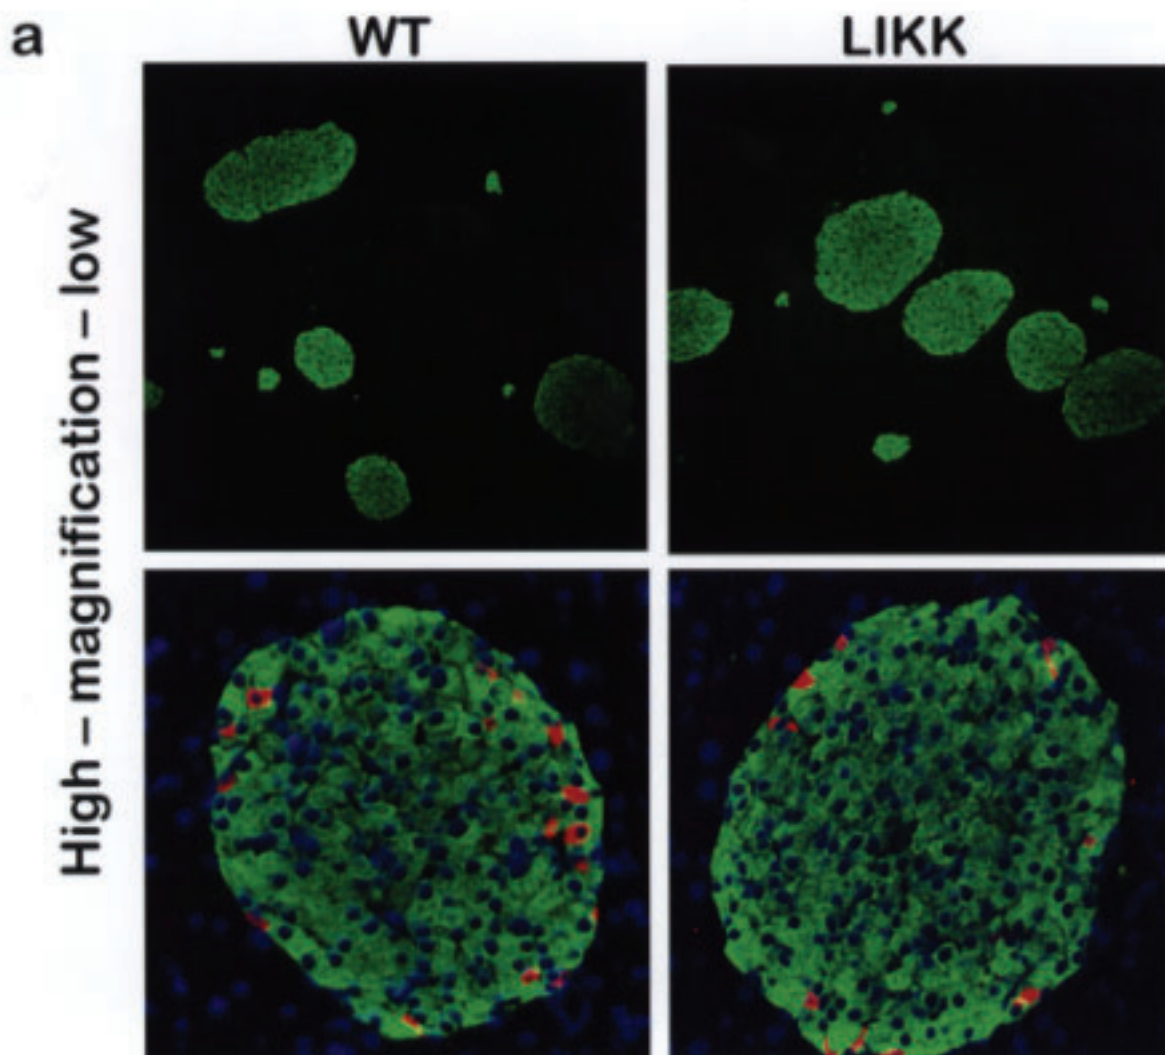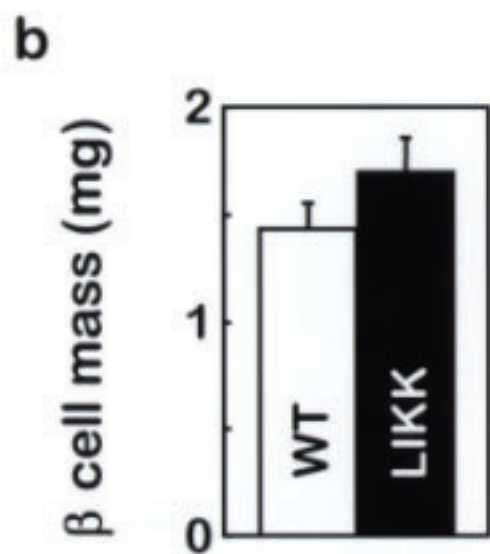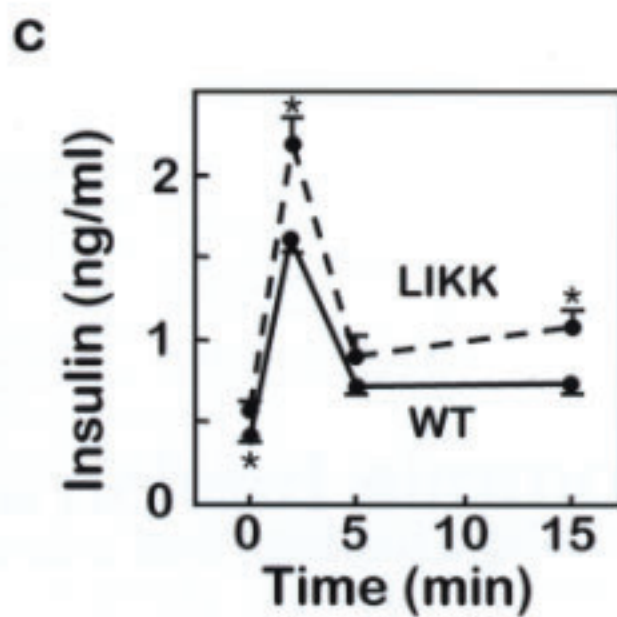

**Supplementary Figure 1.**  $\beta$  cell morphometry and function in LIKK mice. **(a)** Pancreas sections from 12-week-old LIKK and WT mice were stained for insulin (green) and glucagon (red); nuclei are stained blue. **(b)**  $\beta$  cell mass was quantified as described in the methods. **(c)** Acute insulin response was determined following intraperitoneal glucose administration (3 g/kg).

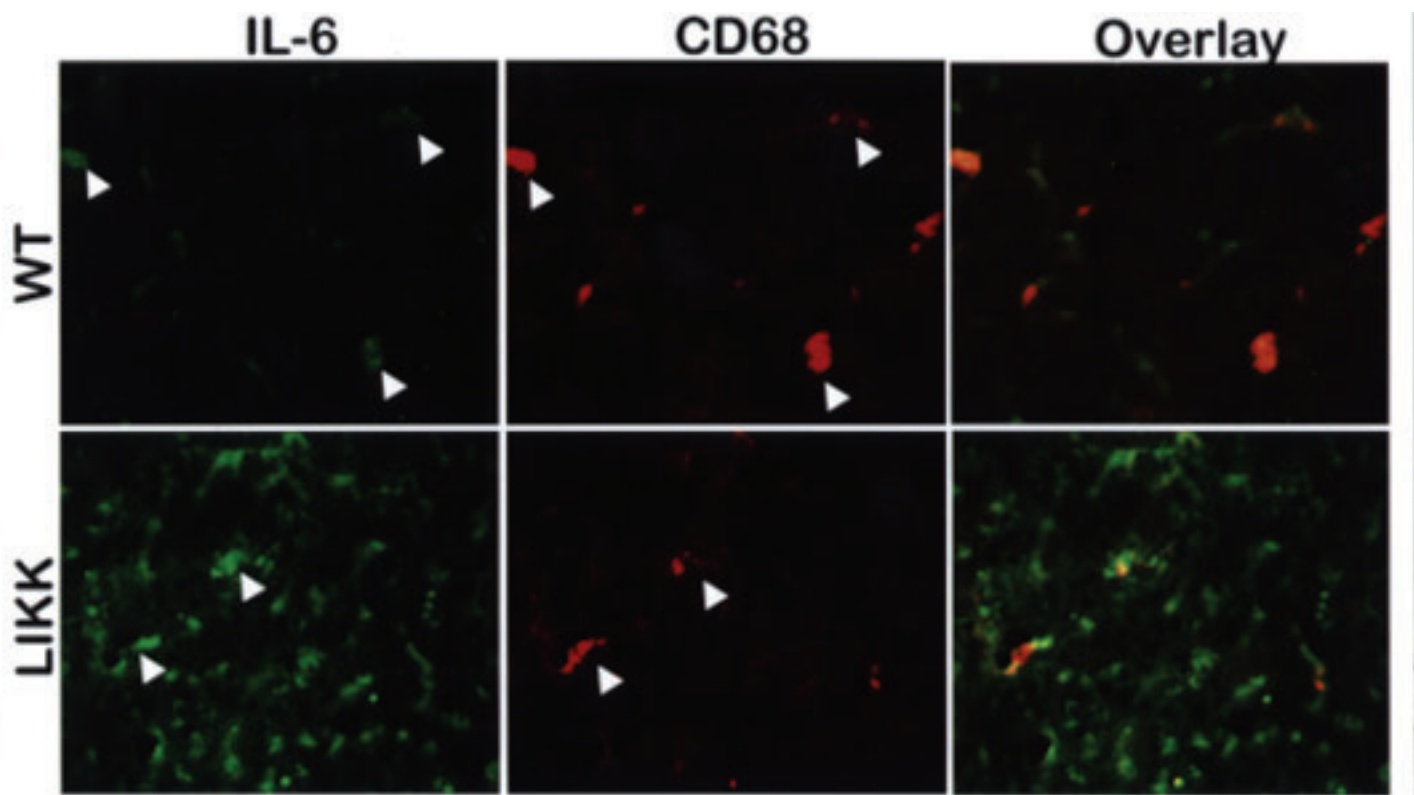

**Supplementary Figure 2.** IL-6 localization in liver. Frozen sections of LIKK and WT liver were stained for IL-6 (green) and CD68 (red). White arrows delineate CD68 positive cells.

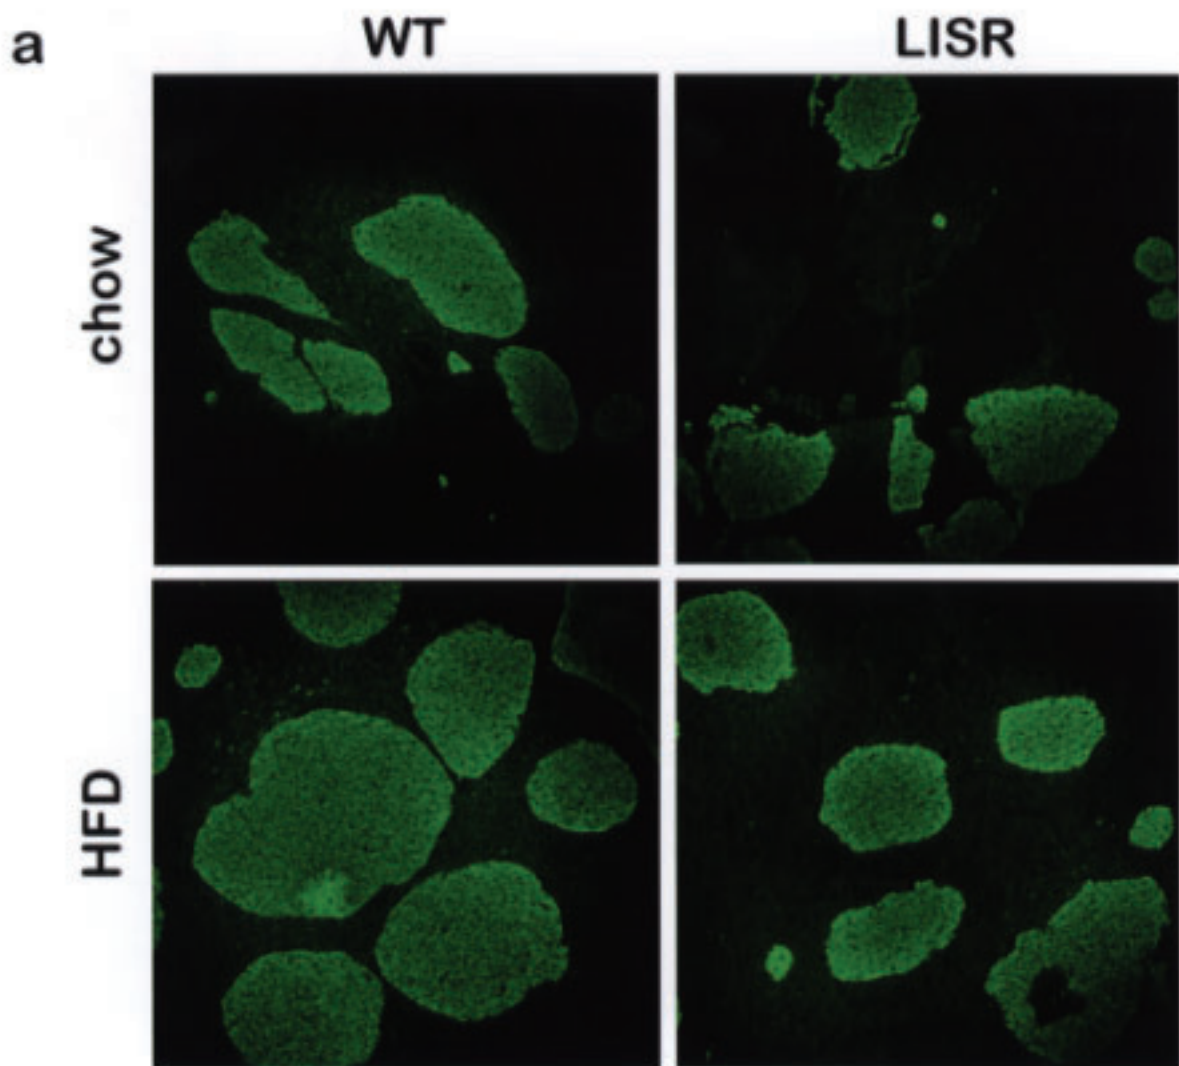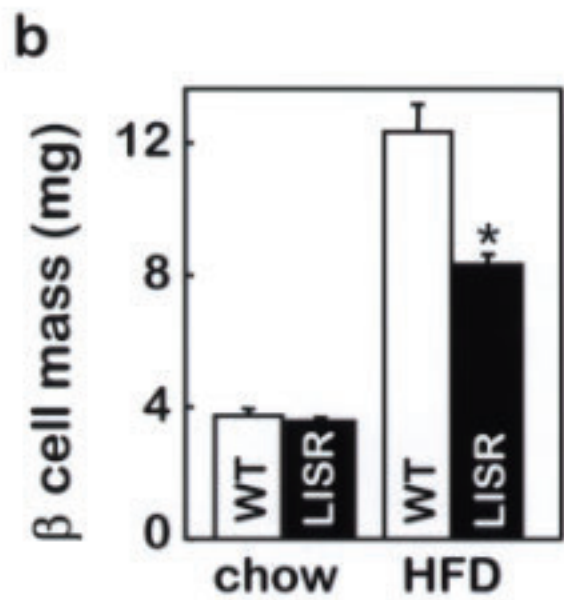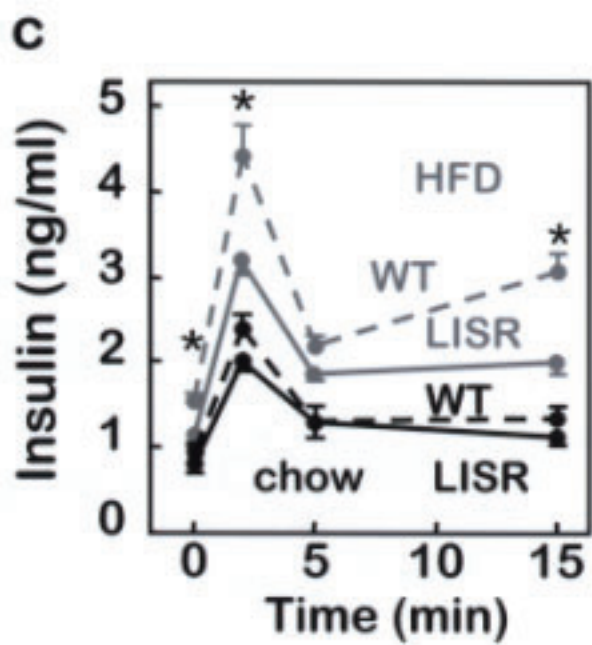

**Supplementary Figure 3.**  $\beta$  cell morphometry and function in LISR mice. **(a)** Pancreas sections from 24-week-old LISR and WT mice were stained for insulin (green). **(b)**  $\beta$  cell mass was quantified as described in the methods. **(c)** Acute insulin response was determined following intraperitoneal glucose administration (3 g/kg).

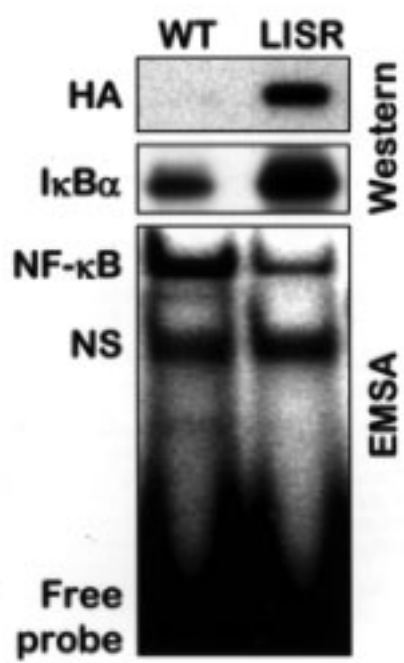

**Supplementary Figure 4.** Superrepressor concentration and NF- $\kappa$ B activity in LISR mice. Western blots were performed with antibodies to HA or I $\kappa$ B $\alpha$ . NF- $\kappa$ B activity was measured by EMSA in livers of LISR and WT mice. NS, non-specific.
